# Supplementary material for: Sex-specific differences in intestinal microbiota associated with cardiovascular diseases
Source: PubMed Central journal article supplement (PMC10797902; doi:10.1186/s13293-024-00582-7), 2024-01-19
Supplement: 13293_2024_582_MOESM1_ESM.pdf [file 13293_2024_582_MOESM1_ESM.pdf]

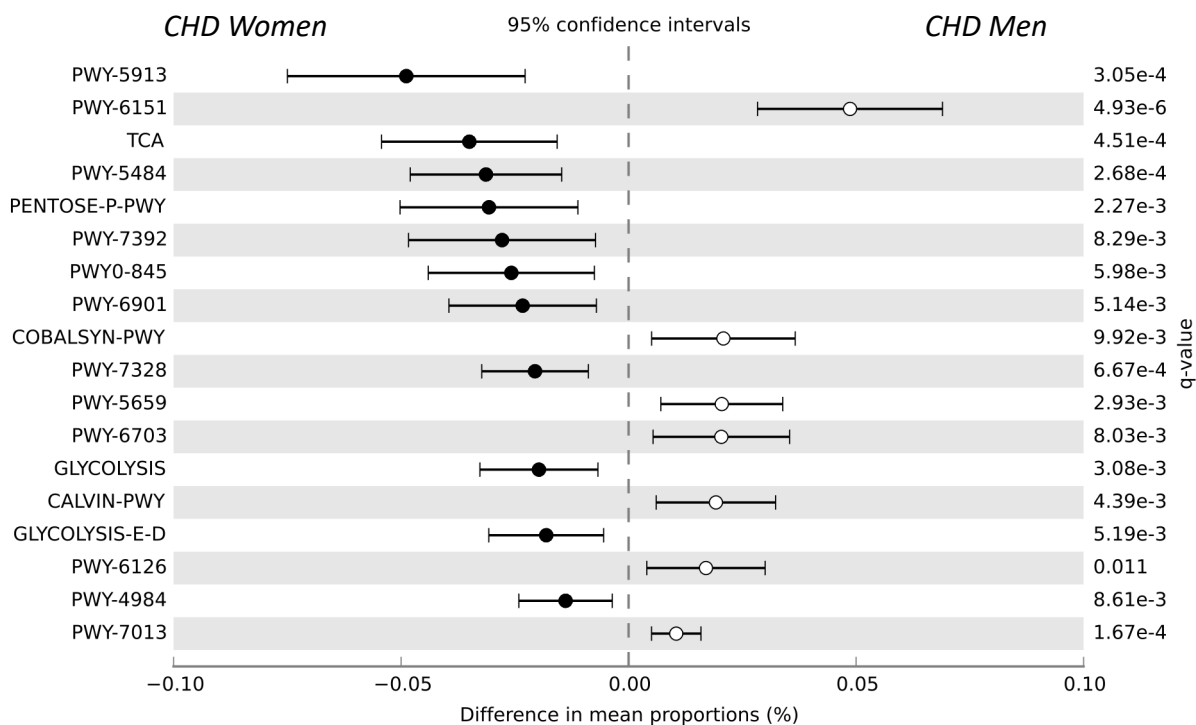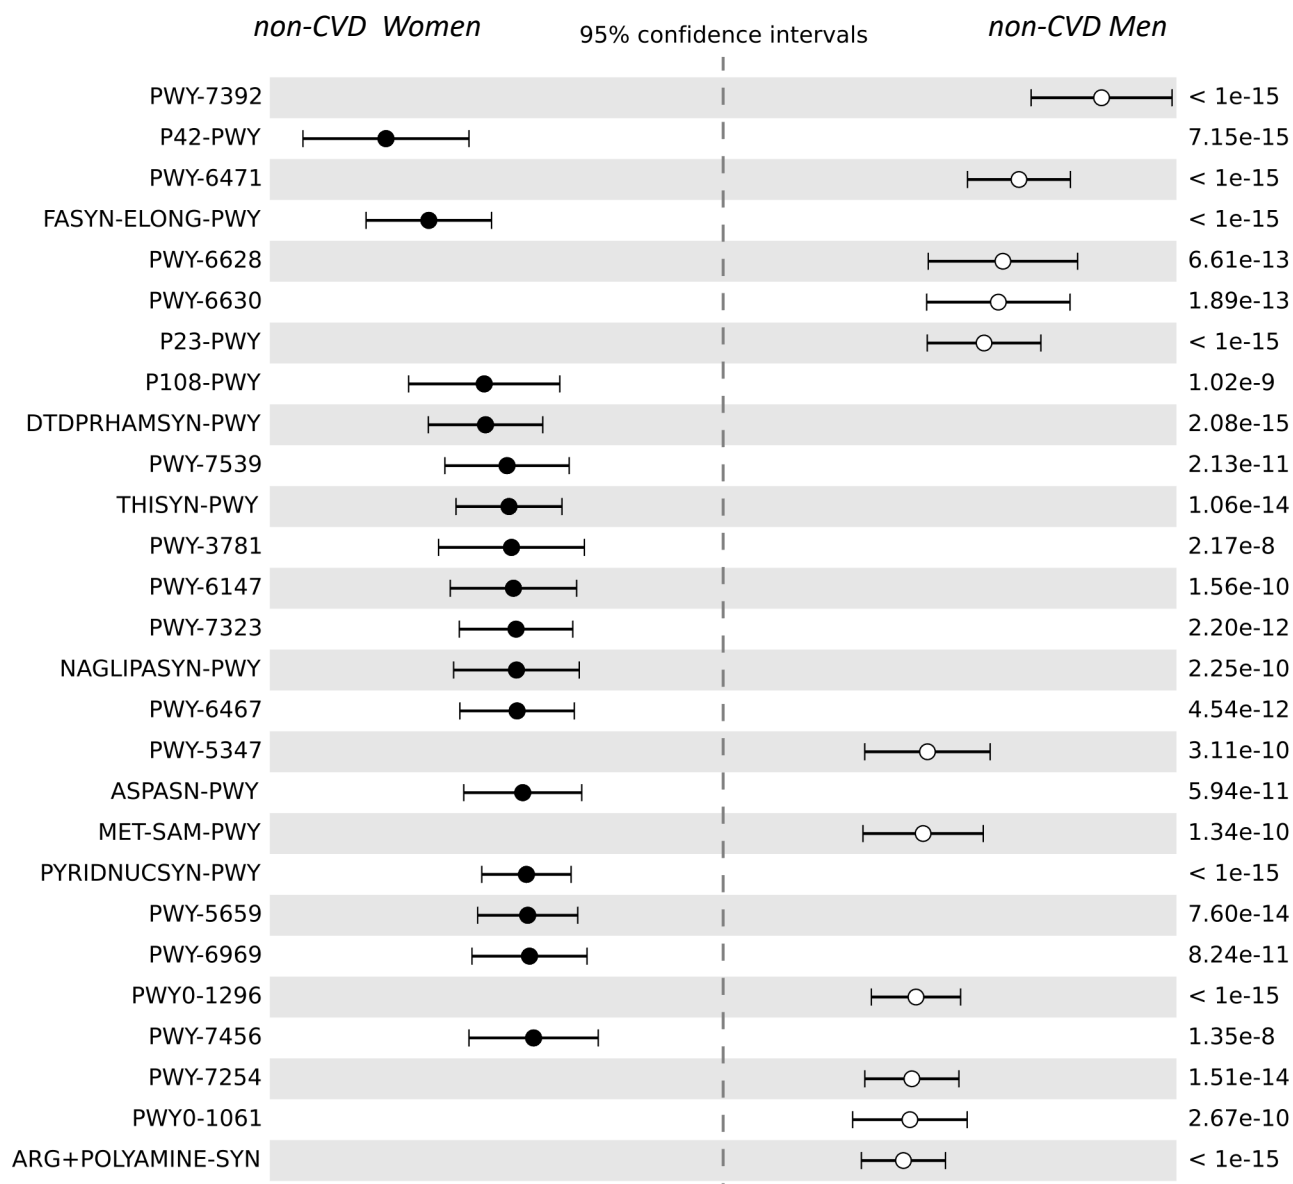

*non-CVD Women**non-CVD Men*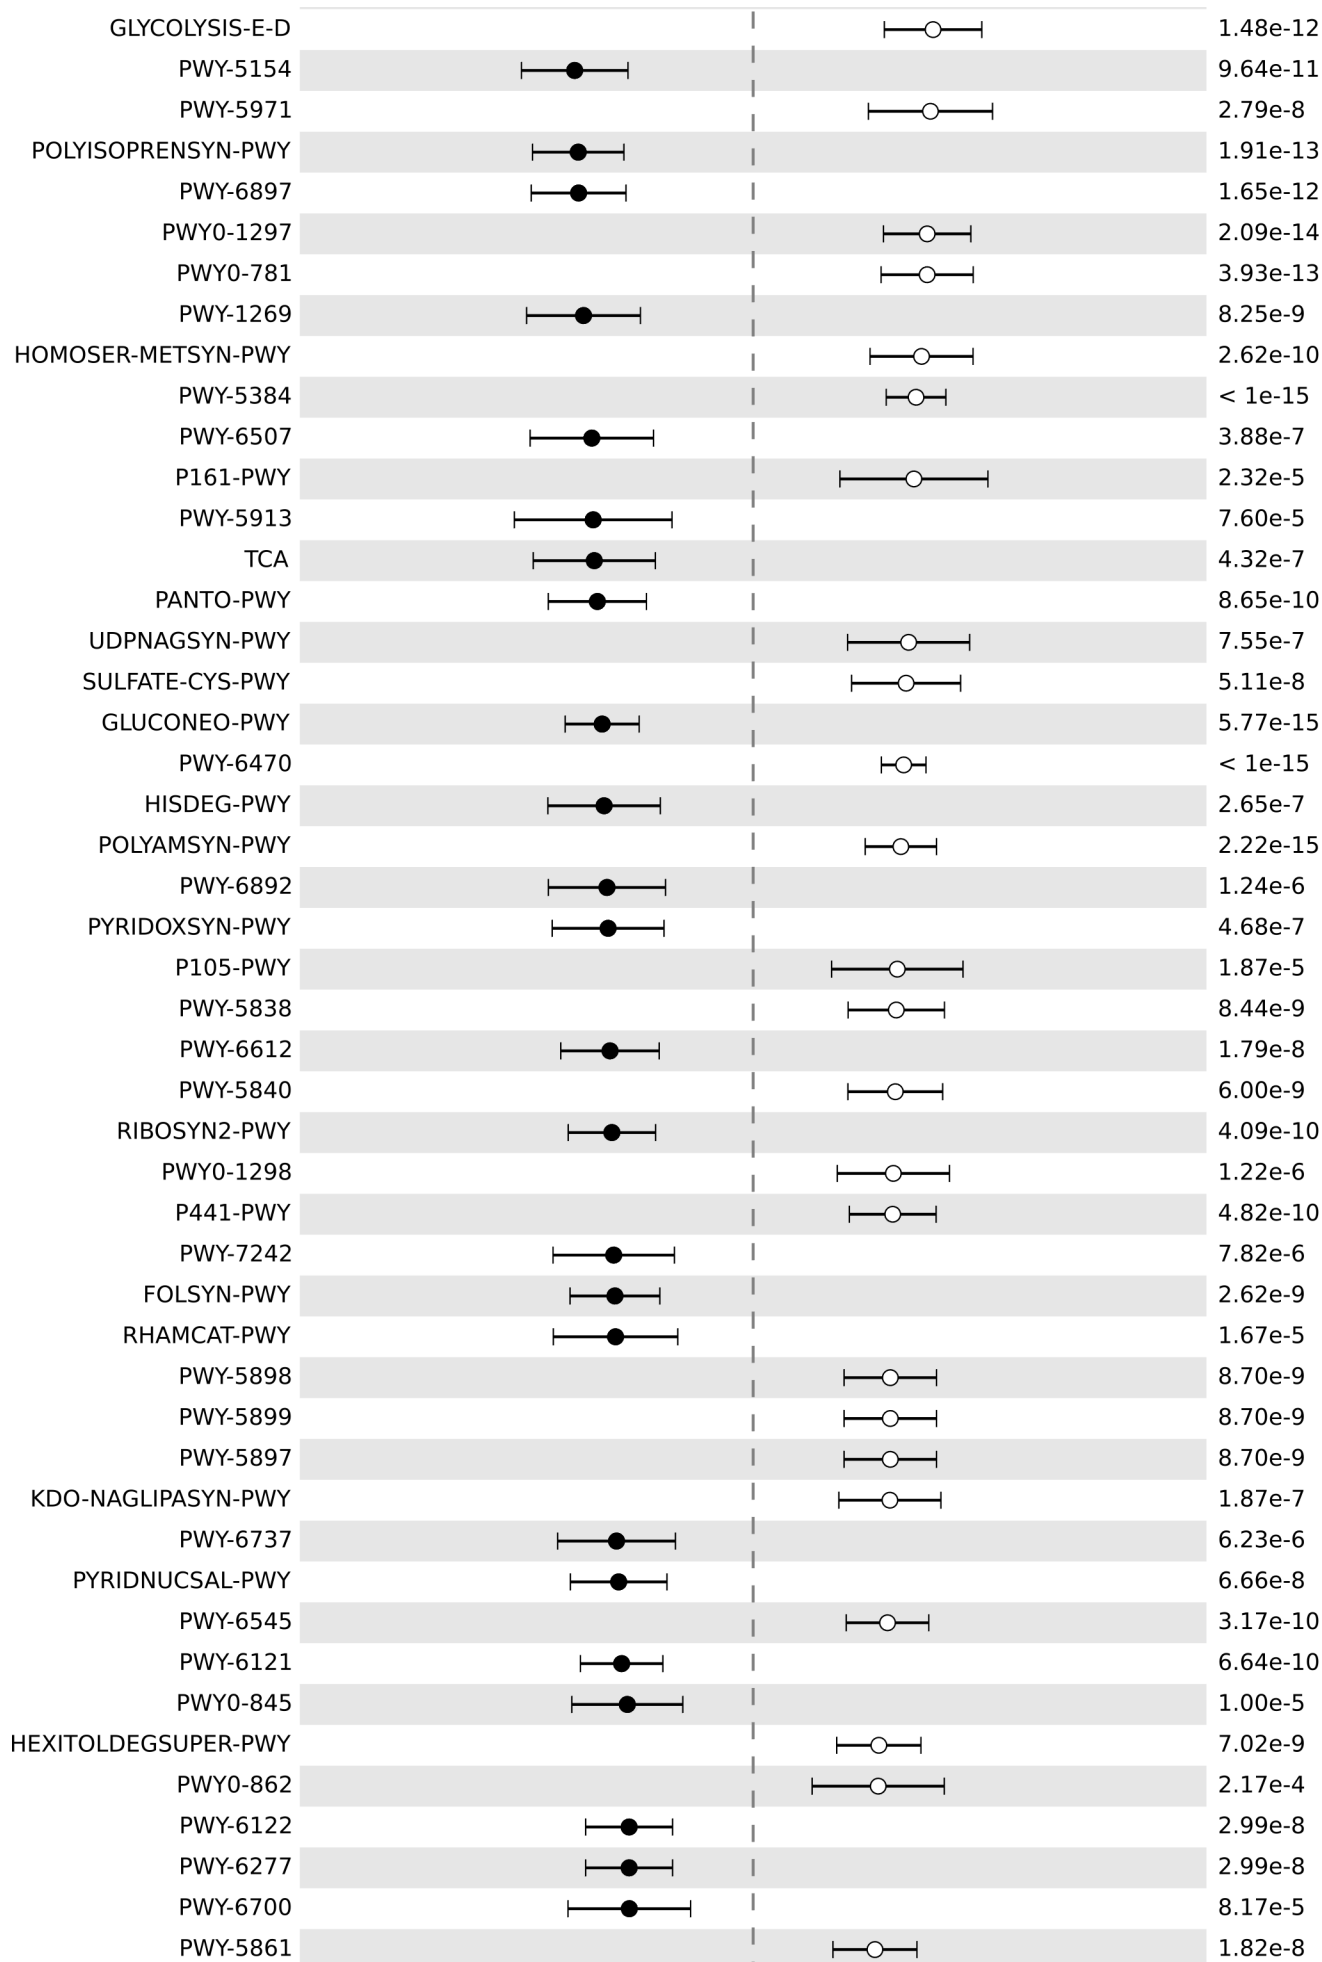

*non-CVD Women**non-CVD Men*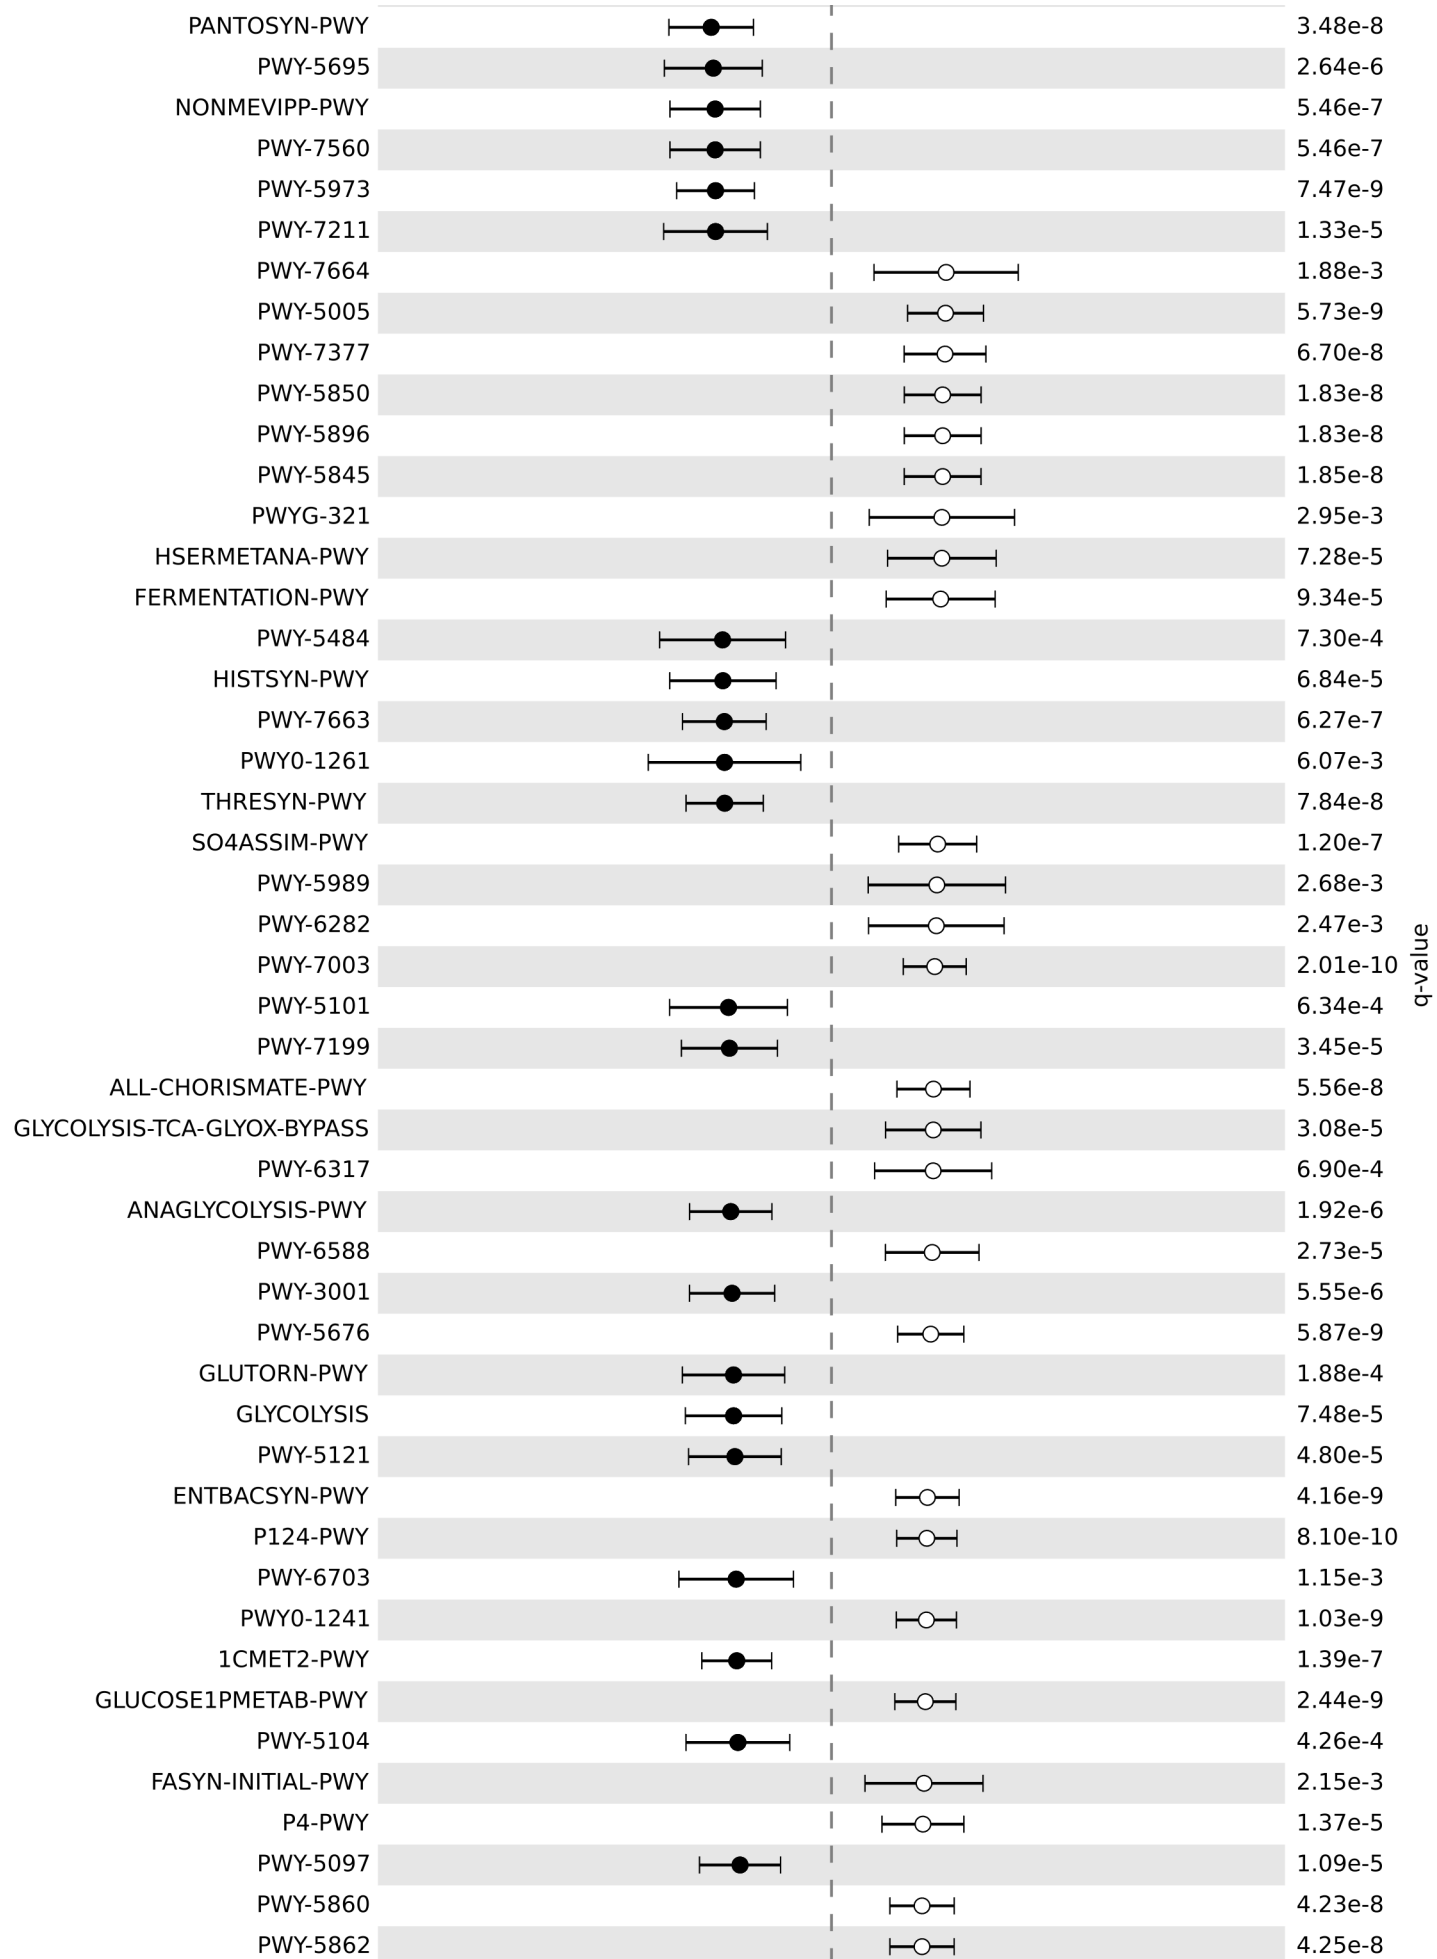

q-value

*non-CVD Women**non-CVD Men*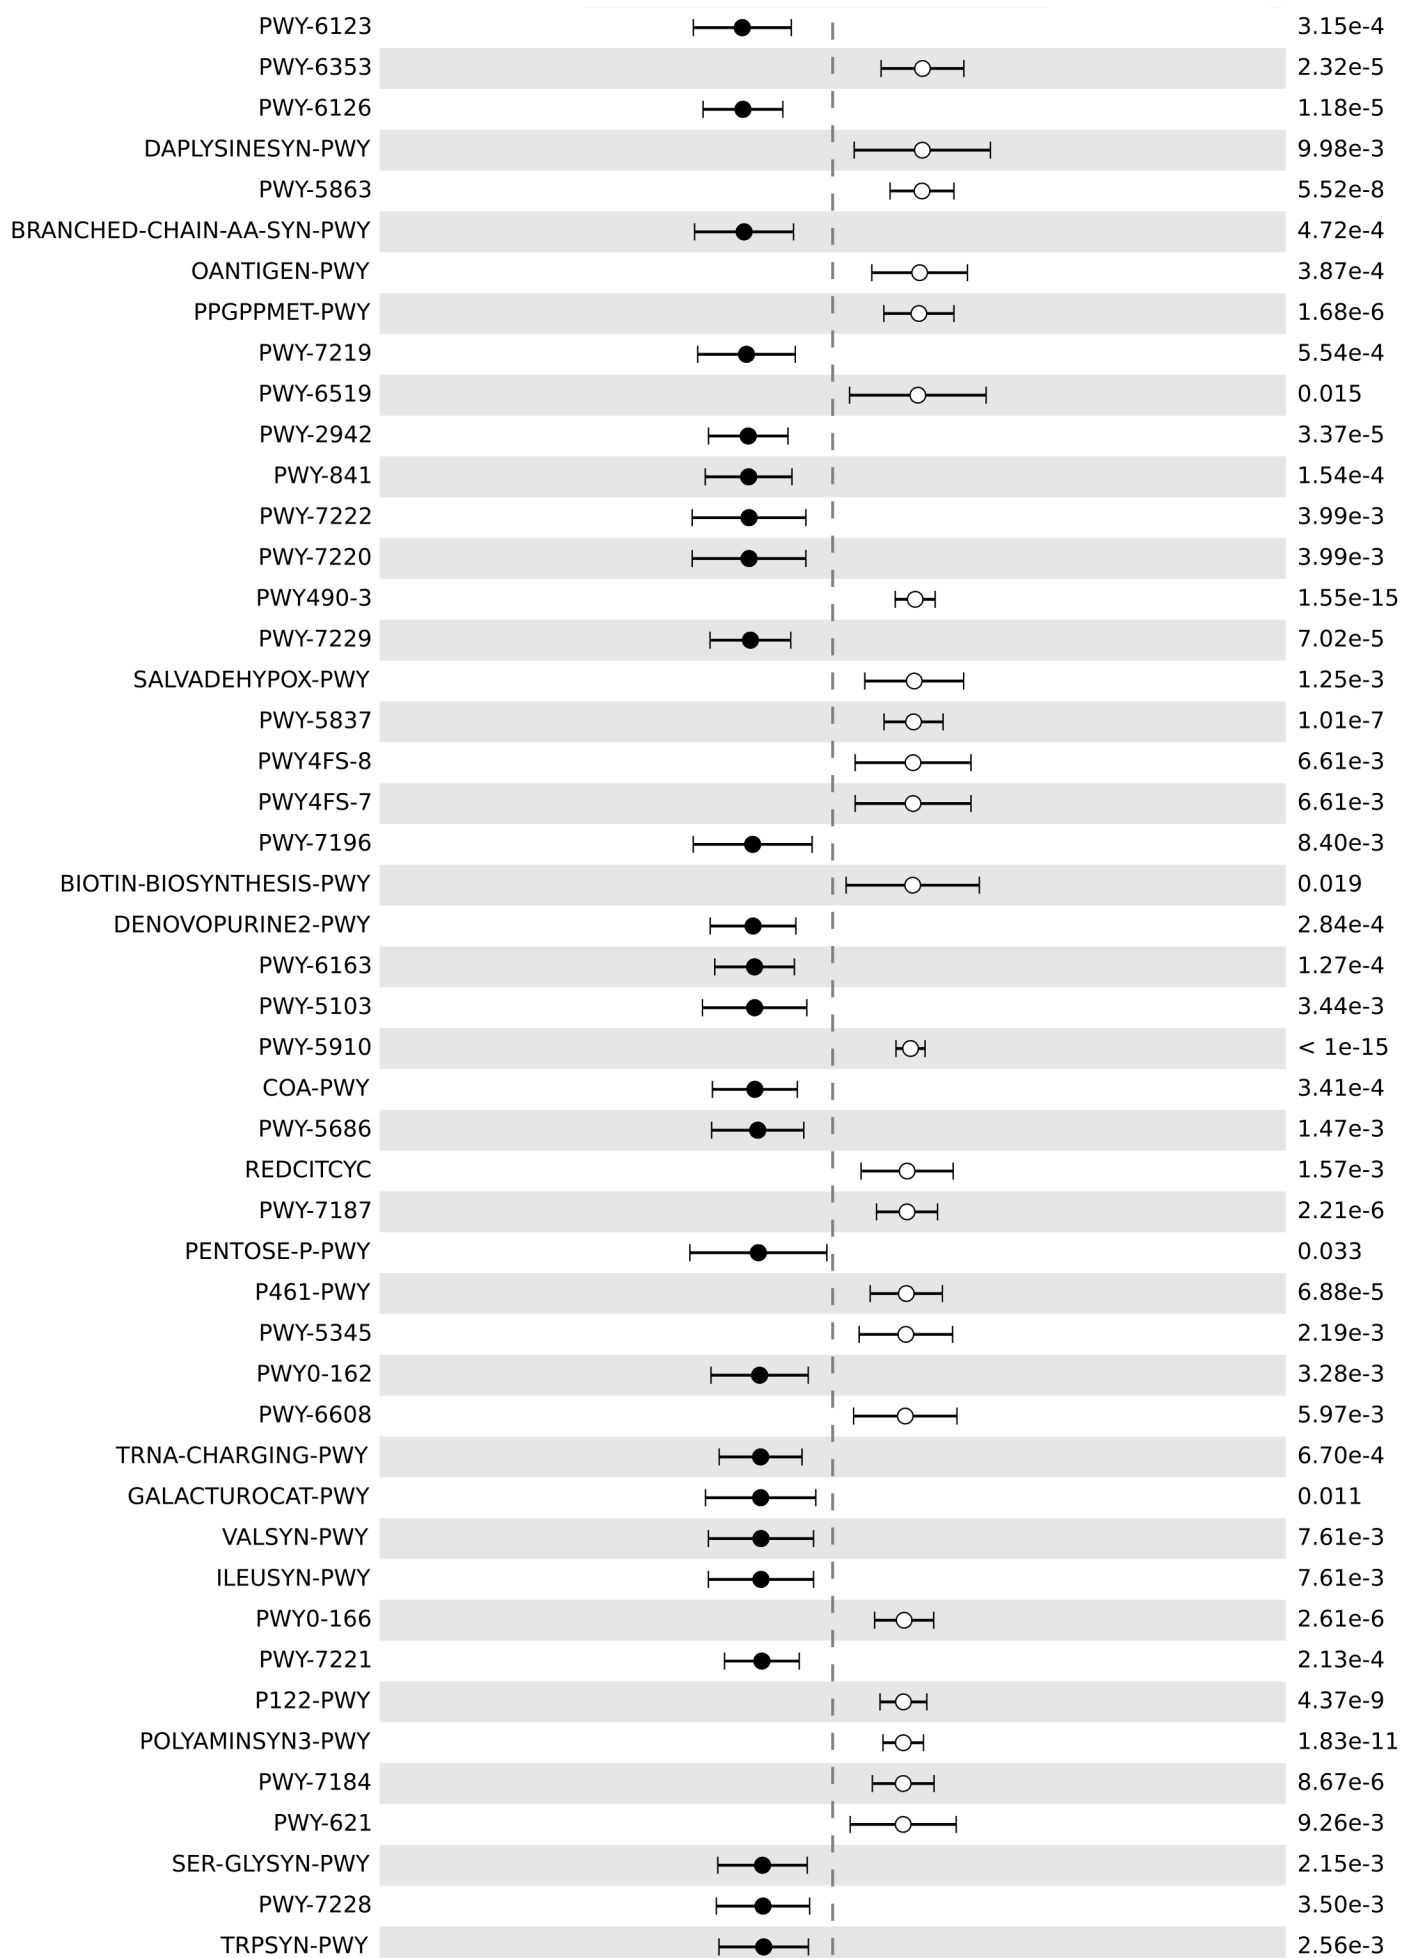

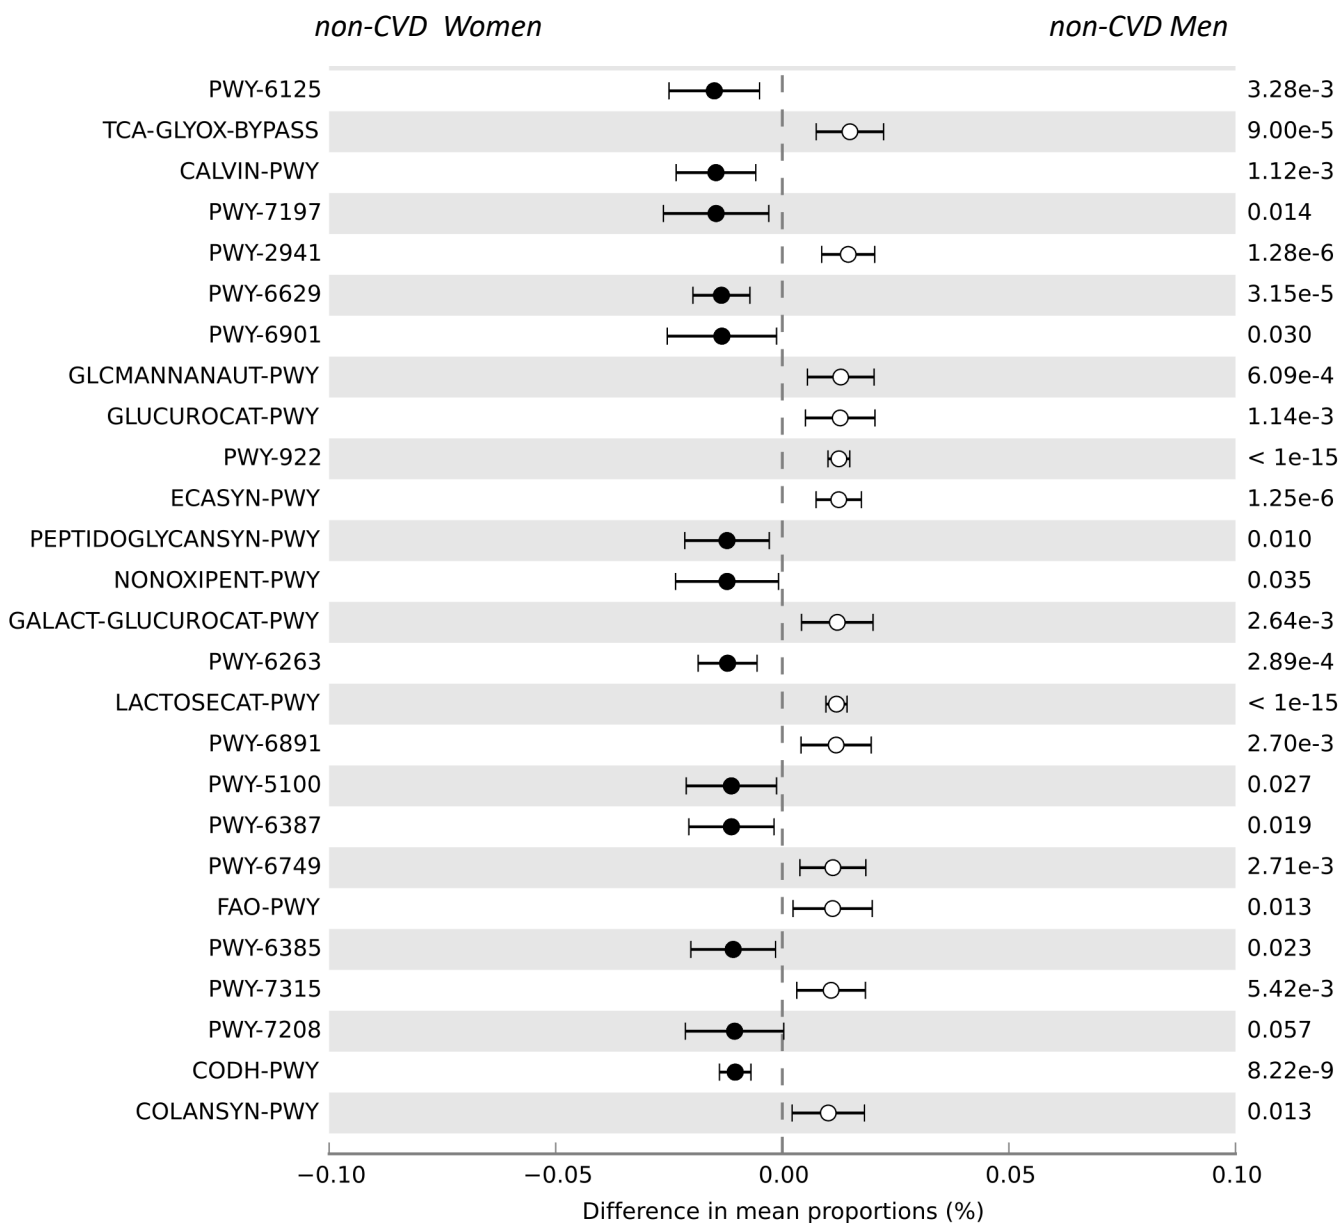

**Figure S1. Functional characterization between CHD patients according to the sex based on PICRUSt2 analysis.**
