# Supplementary material for: Sex-specific differences in intestinal microbiota associated with cardiovascular diseases
Source: PubMed Central journal article supplement (PMC10797902; doi:10.1186/s13293-024-00582-7), 2024-01-19
Supplement: 13293_2024_582_MOESM2_ESM.pdf [file 13293_2024_582_MOESM2_ESM.pdf]

*CHD men versus CHD women*

| <b>BioCyc ID</b> | <b>MetaCyc Pathway</b>                                                                                                                    |
|------------------|-------------------------------------------------------------------------------------------------------------------------------------------|
| PWY-5913         | partial TCA cycle (obligate autotrophs)                                                                                                   |
| PWY-6151         | S-adenosyl-L-methionine salvage I                                                                                                         |
| TCA              | TCA                                                                                                                                       |
| PWY-5484         | glycolysis II (from fructose 6-phosphate)                                                                                                 |
| PENTOSE-P-PWY    | pentose phosphate pathway                                                                                                                 |
| PWY-7392         | taxadiene biosynthesis (engineered)                                                                                                       |
| PWY0-845         | superpathway of pyridoxal 5'-phosphate biosynthesis and salvage                                                                           |
| PWY-6901         | superpathway of glucose and xylose degradation                                                                                            |
| COBALSYN-PWY     | superpathway of adenosylcobalamin salvage from cobinamide I<br>superpathway of UDP-glucose-derived O-antigen building blocks biosynthesis |
| PWY-7328         |                                                                                                                                           |
| PWY-5659         | GDP-mannose biosynthesis                                                                                                                  |
| PWY-6703         | preQ0 biosynthesis                                                                                                                        |
| GLYCOLYSIS       | GLYCOLYSIS                                                                                                                                |
| CALVIN-PWY       | Calvin-Benson-Bassham cycle                                                                                                               |
| GLYCOLYSIS-E-D   | superpathway of glycolysis and the Entner-Doudoroff pathway                                                                               |
| PWY-6126         | superpathway of adenosine nucleotides de novo biosynthesis II                                                                             |
| PWY-4984         | urea cycle                                                                                                                                |
| PWY-7013         | (S)-propane-1,2-diol degradation                                                                                                          |

*non-CVD men versus non-CVD women*

| <b>BioCyc ID</b> | <b>MetaCyc Pathway</b>                                                                                                               |
|------------------|--------------------------------------------------------------------------------------------------------------------------------------|
| PWY-7392         | taxadiene biosynthesis (engineered)                                                                                                  |
| P42-PWY          | incomplete reductive TCA cycle                                                                                                       |
| PWY-6471         | peptidoglycan biosynthesis IV(Enterococcus faecium)                                                                                  |
| FASYN-ELONG-PWY  | fatty acid elongation -- saturated                                                                                                   |
| PWY-6628         | superpathway of L-phenylalanine biosynthesis                                                                                         |
| PWY-6630         | superpathway of L-tyrosine biosynthesis                                                                                              |
| P23-PWY          | reductive TCA cycle I                                                                                                                |
| P108-PWY         | pyruvate fermentation to propanoate I                                                                                                |
| DTDPRHAMSYN-PWY  | dTDP- $\beta$ -L-rhamnose biosynthesis                                                                                               |
| PWY-7539         | 6-hydroxymethyl-dihydropterin diphosphate biosynthesis III (Chlamydia)                                                               |
| THISYN-PWY       | superpathway of thiamine diphosphate biosynthesis I                                                                                  |
| PWY-3781         | aerobic respiration I (cytochrome c)                                                                                                 |
| PWY-6147         | hydroxymethyl-dihydropterin diphosphate biosynthesis I<br>superpathway of GDP-mannose-derived O-antigen building blocks biosynthesis |
| PWY-7323         |                                                                                                                                      |
| NAGLIPASYN-PWY   | lipid IVA biosynthesis (E. coli)                                                                                                     |
| PWY-6467         | Kdo transfer to lipid IVA (Chlamydia)                                                                                                |
| PWY-5347         | superpathway of L-methionine biosynthesis (transsulfuration)                                                                         |
| ASPASN-PWY       | superpathway of L-aspartate and L-asparagine biosynthesis                                                                            |
| MET-SAM-PWY      | superpathway of S-adenosyl-L-methionine biosynthesis                                                                                 |

|                    |                                                                |
|--------------------|----------------------------------------------------------------|
| PYRIDNUCSYN-PWY    | NAD de novo biosynthesis I                                     |
| PWY-5659           | GDP-mannose biosynthesis                                       |
| PWY-6969           | TCA cycle V (2-oxoglutarate synthase)                          |
| PWY0-1296          | purine ribonucleosides degradation                             |
| PWY-7456           | $\beta$ -(1,4)-mannan degradation                              |
| PWY-7254           | TCA cycle VII (acetate-producers)                              |
| PWY0-1061          | superpathway of L-alanine biosynthesis                         |
| ARG+POLYAMINE-SYN  | superpathway of arginine and polyamine biosynthesis            |
| GLYCOLYSIS-E-D     | superpathway of glycolysis and the Entner-Doudoroff pathway    |
| PWY-5154           | L-arginine biosynthesis III (via N-acetyl-L-citrulline)        |
| PWY-5971           | palmitate biosynthesis II (type II fatty acid synthase)        |
| POLYISOPRENSYN-PWY | polyisoprenoid biosynthesis (E. coli)                          |
| PWY-6897           | thiamine diphosphate salvage II                                |
| PWY0-1297          | superpathway of purine deoxyribonucleosides degradation        |
| PWY0-781           | aspartate superpathway                                         |
| PWY-1269           | CMP-3-deoxy-D-manno-octulosonate biosynthesis                  |
| HOMOSER-METSYN-PWY | L-methionine biosynthesis I                                    |
| PWY-5384           | sucrose degradation IV (sucrose phosphorylase)                 |
| PWY-6507           | 4-deoxy-L-threo-hex-4-enopyranuronate degradation              |
| P161-PWY           | acetylene degradation (anaerobic)                              |
| PWY-5913           | partial TCA cycle (obligate autotrophs)                        |
| TCA                | TCA cycle I (prokaryotic)                                      |
| PANTO-PWY          | phosphopantothenate biosynthesis I                             |
| UDPNAGSYN-PWY      | UDP-N-acetyl-D-glucosamine biosynthesis I                      |
| SULFATE-CYS-PWY    | superpathway of sulfate assimilation and cysteine biosynthesis |
| GLUCONEO-PWY       | gluconeogenesis I                                              |
| PWY-6470           | peptidoglycan biosynthesis V ( $\beta$ -lactam resistance)     |
| HISDEG-PWY         | L-histidine degradation I                                      |
| POLYAMSYN-PWY      | superpathway of polyamine biosynthesis I                       |
| PWY-6892           | thiazole component of thiamine diphosphate biosynthesis I      |
| PYRIDOXSYN-PWY     | pyridoxal 5'-phosphate biosynthesis I                          |
| P105-PWY           | TCA cycle IV (2-oxoglutarate decarboxylase)                    |
| PWY-5838           | superpathway of menaquinol-8 biosynthesis I                    |
| PWY-6612           | superpathway of tetrahydrofolate biosynthesis                  |
| PWY-5840           | superpathway of menaquinol-7 biosynthesis                      |
| RIBOSYN2-PWY       | flavin biosynthesis I (bacteria and plants)                    |
| PWY0-1298          | superpathway of pyrimidine deoxyribonucleosides degradation    |
| P441-PWY           | superpathway of N-acetylneuraminate degradation                |
| PWY-7242           | D-fructuronate degradation                                     |
| FOLSYN-PWY         | superpathway of tetrahydrofolate biosynthesis and salvage      |
| RHAMCAT-PWY        | L-rhamnose degradation I                                       |
| PWY-5898           | superpathway of menaquinol-12 biosynthesis                     |
| PWY-5899           | superpathway of menaquinol-13 biosynthesis                     |

|                             |                                                                                |
|-----------------------------|--------------------------------------------------------------------------------|
| PWY-5897                    | superpathway of menaquinol-11 biosynthesis                                     |
| KDO-NAGLIPASYN-PWY          | superpathway of (Kdo) <sub>2</sub> -lipid A biosynthesis                       |
| PWY-6737                    | starch degradation V                                                           |
| PYRIDNUCSAL-PWY             | NAD salvage pathway I (PNC VI cycle)                                           |
| PWY-6545                    | pyrimidine deoxyribonucleotides de novo biosynthesis III                       |
| PWY-6121                    | 5-aminoimidazole ribonucleotide biosynthesis I                                 |
| PWY0-845                    | superpathway of pyridoxal 5'-phosphate biosynthesis and salvage                |
| HEXITOLDEGSUPER-PWY         | superpathway of hexitol degradation (bacteria)                                 |
| PWY0-862                    | (5Z)-dodecenoate biosynthesis I                                                |
| PWY-6122                    | 5-aminoimidazole ribonucleotide biosynthesis II                                |
| PWY-6277                    | superpathway of 5-aminoimidazole ribonucleotide biosynthesis                   |
| PWY-6700                    | queuosine biosynthesis I (de novo)                                             |
| PWY-5861                    | superpathway of demethylmenaquinol-8 biosynthesis I                            |
| PANTOSYN-PWY                | superpathway of coenzyme A biosynthesis I (bacteria)                           |
| PWY-5695                    | inosine 5'-phosphate degradation                                               |
| NONMEVIPP-PWY               | methylerythritol phosphate pathway I                                           |
| PWY-7560                    | methylerythritol phosphate pathway II                                          |
| PWY-5973                    | cis-vaccenate biosynthesis                                                     |
| PWY-7211                    | superpathway of pyrimidine deoxyribonucleotides de novo biosynthesis           |
| PWY-7664                    | oleate biosynthesis IV (anaerobic)                                             |
| PWY-5005                    | biotin biosynthesis II                                                         |
| PWY-7377                    | cob(II)yrinate a,c-diamide biosynthesis I (early cobalt insertion)             |
| PWY-5850                    | superpathway of menaquinol-6 biosynthesis                                      |
| PWY-5896                    | superpathway of menaquinol-10 biosynthesis                                     |
| PWY-5845                    | superpathway of menaquinol-9 biosynthesis                                      |
| PWYG-321                    | mycolate biosynthesis                                                          |
| HSERMETANA-PWY              | L-methionine biosynthesis III                                                  |
| FERMENTATION-PWY            | mixed acid fermentation                                                        |
| PWY-5484                    | glycolysis II (from fructose 6-phosphate)                                      |
| HISTSYN-PWY                 | L-histidine biosynthesis                                                       |
| PWY-7663                    | gondoate biosynthesis (anaerobic)                                              |
| PWY0-1261                   | peptidoglycan recycling I                                                      |
| THRESYN-PWY                 | superpathway of L-threonine biosynthesis                                       |
| SO4ASSIM-PWY                | assimilatory sulfate reduction I                                               |
| PWY-5989                    | stearate biosynthesis II (bacteria and plants)                                 |
| PWY-6282                    | palmitoleate biosynthesis I (from (5Z)-dodec-5-enoate)                         |
| PWY-7003                    | lycerol degradation to butanol                                                 |
| PWY-5101                    | L-isoleucine biosynthesis II                                                   |
| PWY-7199                    | pyrimidine deoxyribonucleosides salvage                                        |
| ALL-CHORISMATE-PWY          | superpathway of chorismate metabolism                                          |
| GLYCOLYSIS-TCA-GLYOX-BYPASS | superpathway of glycolysis, pyruvate dehydrogenase, TCA, and glyoxylate bypass |
| PWY-6317                    | D-galactose degradation I (Leloir pathway)                                     |
| ANAGLYCOLYSIS-PWY           | glycolysis III (from glucose)                                                  |

|                           |                                                                           |
|---------------------------|---------------------------------------------------------------------------|
| PWY-6588                  | pyruvate fermentation to acetone                                          |
| PWY-3001                  | superpathway of L-isoleucine biosynthesis I                               |
| PWY-5676                  | acetyl-CoA fermentation to butanoate                                      |
| GLUTORN-PWY               | L-ornithine biosynthesis I                                                |
| GLYCOLYSIS                | glycolysis I (from glucose 6-phosphate)                                   |
| PWY-5121                  | superpathway of geranylgeranyl diphosphate biosynthesis II (via MEP)      |
| ENTBACSYN-PWY             | enterobactin biosynthesis                                                 |
| P124-PWY                  | Bifidobacterium shunt                                                     |
| PWY-6703                  | preQ0 biosynthesis                                                        |
| PWY0-1241                 | ADP-L-glycero- $\beta$ -D-manno-heptose biosynthesis                      |
| 1CMET2-PWY                | folate transformations III (E. coli)                                      |
| LUCOSE1PMETAB-PWY         | glucose and glucose-1-phosphate degradation                               |
| PWY-5104                  | L-isoleucine biosynthesis IV                                              |
| FASYN-INITIAL-PWY         | superpathway of fatty acid biosynthesis initiation                        |
| P4-PWY                    | superpathway of L-lysine, L-threonine and L-methionine biosynthesis I     |
| PWY-5097                  | L-lysine biosynthesis VI                                                  |
| PWY-5860                  | superpathway of demethylmenaquinol-6 biosynthesis I                       |
| PWY-5862                  | superpathway of demethylmenaquinol-9 biosynthesis                         |
| PWY-6123                  | inosine-5'-phosphate biosynthesis I                                       |
| PWY-6126                  | superpathway of adenosine nucleotides de novo biosynthesis II             |
| DAPLYSINESYN-PWY          | L-lysine biosynthesis I                                                   |
| PWY-5863                  | superpathway of phylloquinol biosynthesis                                 |
| BRANCHED-CHAIN-AA-SYN-PWY | superpathway of branched chain amino acid biosynthesis                    |
| OANTIGEN-PWY              | O-antigen building blocks biosynthesis (E. coli)                          |
| PPGPPMET-PWY              | ppGpp metabolism                                                          |
| PWY-7219                  | adenosine ribonucleotides de novo biosynthesis                            |
| PWY-6519                  | 8-amino-7-oxononanoate biosynthesis I                                     |
| PWY-2942                  | L-lysine biosynthesis III                                                 |
| PWY-841                   | superpathway of purine nucleotides de novo biosynthesis I                 |
| PWY-7222                  | guanosine deoxyribonucleotides de novo biosynthesis II                    |
| PWY-7220                  | adenosine deoxyribonucleotides de novo biosynthesis II                    |
| PWY490-3                  | nitrate reduction VI (assimilatory)                                       |
| PWY-7229                  | superpathway of adenosine nucleotides de novo biosynthesis I              |
| SALVADEHYPOX-PWY          | adenosine nucleotides degradation II                                      |
| PWY-5837                  | 2-carboxy-1,4-naphthoquinol biosynthesis                                  |
| PWY4FS-8                  | phosphatidylglycerol biosynthesis II                                      |
| PWY4FS-7                  | phosphatidylglycerol biosynthesis I                                       |
| PWY-7196                  | superpathway of pyrimidine ribonucleosides salvage                        |
| BIOTIN-BIOSYNTHESIS-PWY   | biotin biosynthesis I                                                     |
| DENOVOPURINE2-PWY         | superpathway of purine nucleotides de novo biosynthesis II                |
| PWY-6163                  | chorismate biosynthesis from 3-dehydroquinate                             |
| PWY-5103                  | L-isoleucine biosynthesis III                                             |
| PWY-5910                  | superpathway of geranylgeranyldiphosphate biosynthesis I (via mevalonate) |

|                       |                                                                                                                                                                        |
|-----------------------|------------------------------------------------------------------------------------------------------------------------------------------------------------------------|
| COA-PWY               | coenzyme A biosynthesis I (bacteria)                                                                                                                                   |
| PWY-5686              | UMP biosynthesis I                                                                                                                                                     |
| REDCITCYC             | TCA cycle VI (Helicobacter)                                                                                                                                            |
| PWY-7187              | pyrimidine deoxyribonucleotides <i>de novo</i> biosynthesis II                                                                                                         |
| PENTOSE-P-PWY         | pentose phosphate pathway                                                                                                                                              |
| P461-PWY              | hexitol fermentation to lactate, formate, ethanol and acetate                                                                                                          |
| PWY-5345              | superpathway of L-methionine biosynthesis (by sulfhydrylation)                                                                                                         |
| PWY0-162              | superpathway of pyrimidine ribonucleotides <i>de novo</i> biosynthesis                                                                                                 |
| PWY-6608              | guanosine nucleotides degradation III                                                                                                                                  |
| TRNA-CHARGING-PWY     | tRNA charging                                                                                                                                                          |
| GALACTUROCAT-PWY      | D-galacturonate degradation I                                                                                                                                          |
| VALSYN-PWY            | L-valine biosynthesis                                                                                                                                                  |
| ILEUSYN-PWY           | L-isoleucine biosynthesis I (from threonine)                                                                                                                           |
| PWY0-166              | superpathway of pyrimidine deoxyribonucleotides <i>de novo</i> biosynthesis (E. coli)                                                                                  |
| PWY-7221              | guanosine ribonucleotides <i>de novo</i> biosynthesis                                                                                                                  |
| P122-PWY              | heterolactic fermentation                                                                                                                                              |
| POLYAMINSYN3-PWY      | superpathway of polyamine biosynthesis II                                                                                                                              |
| PWY-7184              | pyrimidine deoxyribonucleotides <i>de novo</i> biosynthesis I                                                                                                          |
| PWY-621               | sucrose degradation III (sucrose invertase)                                                                                                                            |
| SER-GLYSYN-PWY        | superpathway of L-serine and glycine biosynthesis I                                                                                                                    |
| PWY-7228              | superpathway of guanosine nucleotides <i>de novo</i> biosynthesis I                                                                                                    |
| TRPSYN-PWY            | L-tryptophan biosynthesis                                                                                                                                              |
| PWY-6125              | superpathway of guanosine nucleotides <i>de novo</i> biosynthesis II                                                                                                   |
| TCA-GLYOX-BYPASS      | superpathway of glyoxylate bypass and TCA                                                                                                                              |
| CALVIN-PWY            | Calvin-Benson-Bassham cycle                                                                                                                                            |
| PWY-7197              | pyrimidine deoxyribonucleotide phosphorylation                                                                                                                         |
| PWY-2941              | L-lysine biosynthesis II                                                                                                                                               |
| PWY-6629              | superpathway of L-tryptophan biosynthesis                                                                                                                              |
| PWY-6901              | superpathway of glucose and xylose degradation<br>superpathway of <i>N</i> -acetylglucosamine, <i>N</i> -acetylmannosamine and <i>N</i> -acetylneuraminate degradation |
| GLCMANNANAUT-PWY      |                                                                                                                                                                        |
| GLUCUROCAT-PWY        | superpathway of $\beta$ -D-glucuronosides degradation                                                                                                                  |
| PWY-922               | mevalonate pathway I (eukaryotes and bacteria)                                                                                                                         |
| ECASYN-PWY            | enterobacterial common antigen biosynthesis                                                                                                                            |
| PEPTIDOGLYCANSYN-PWY  | peptidoglycan biosynthesis I ( <i>meso</i> -diaminopimelate containing)                                                                                                |
| NONOXIPENT-PWY        | pentose phosphate pathway (non-oxidative branch) I                                                                                                                     |
| GALACT-GLUCUROCAT-PWY | superpathway of hexuronide and hexuronate degradation                                                                                                                  |
| PWY-6263              | superpathway of menaquinol-8 biosynthesis II                                                                                                                           |
| LACTOSECAT-PWY        | lactose degradation I                                                                                                                                                  |
| PWY-6891              | thiazole component of thiamine diphosphate biosynthesis II                                                                                                             |
| PWY-5100              | pyruvate fermentation to acetate and lactate II                                                                                                                        |
| PWY-6387              | UDP- <i>N</i> -acetylmuramoyl-pentapeptide biosynthesis I ( <i>meso</i> -diaminopimelate containing)                                                                   |
| PWY-6749              | CMP-legionaminate biosynthesis I                                                                                                                                       |

|              |                                                                 |
|--------------|-----------------------------------------------------------------|
| FAO-PWY      | fatty acid $\beta$ -oxidation I (generic)                       |
| PWY-6385     | peptidoglycan biosynthesis III (mycobacteria)                   |
| PWY-7315     | dTDP- <i>N</i> -acetylthomosamine biosynthesis                  |
| PWY-7208     | superpathway of pyrimidine nucleobases salvage                  |
| CODH-PWY     | reductive acetyl coenzyme A pathway I (homoacetogenic bacteria) |
| COLANSYN-PWY | colanic acid building blocks biosynthesis                       |

---

**Table S1. Functional characterization.** Correspondence between BioCyc ID and MetaCyc Pathway nomenclature.
